# Supplementary material for: A sustained deficiency of mitochondrial respiratory complex III induces an apoptotic cell death through the p53-mediated inhibition of pro-survival activities of the activating transcription factor 4
Source: PubMed Central journal article supplement (PMC4260727; doi:10.1038/cddis.2014.469), 2014-11-06
Supplement: cddis2014469x2.pdf [file cddis2014469x2.pdf]

# Supplementary tables

A sustained deficiency of mitochondrial respiratory complex III induces an apoptotic cell death through the p53-mediated inhibition of pro-survival activities of the Activating Transcription Factor 4

Alexandra G. Evstafieva, Alisa A. Garaeva, Anastasia A. Khutornenko, Anna V. Klepikova, Maria D. Logacheva, Alexey A. Penin, German E. Novakovsky, Irina E. Kovaleva, and Peter M. Chumakov.

**Table S1 A list of genes up-regulated by myxothiazol in the absence of p53 activation**

A list of genes, up-regulated after treatment HCT116 cells with myxothiazol for 5 h or with myxothiazol and uridine for 13 h (no p53 activation), but not up-regulated after treatment with myxothiazol alone for 13 h (after p53 activation); mRNA-Seq results.

| <b>Ensemble ID</b> | <b>Gene symbol</b>       | <b>David Gene Name</b>                                                                                      |
|--------------------|--------------------------|-------------------------------------------------------------------------------------------------------------|
| ENSG00000090861    | <a href="#">AARS</a>     | alanyl-tRNA synthetase                                                                                      |
| ENSG00000128165    | <a href="#">Adm2</a>     | adrenomedullin 2                                                                                            |
| ENSG00000026652    | <a href="#">AGPAT4</a>   | 1-acylglycerol-3-phosphate O-acyltransferase 4 (lysophosphatidic acid acyltransferase, delta)               |
| ENSG00000131016    | <a href="#">AKAP12</a>   | A kinase (PRKA) anchor protein 12                                                                           |
| ENSG00000151743    | <a href="#">AMN1</a>     | antagonist of mitotic exit network 1 homolog (S. cerevisiae)                                                |
| ENSG00000145362    | <a href="#">ank2</a>     | ankyrin 2, neuronal                                                                                         |
| ENSG00000138660    | <a href="#">AP1AR</a>    | chromosome 4 open reading frame 16                                                                          |
| ENSG00000172901    | <a href="#">AQPEP</a>    | laeverin                                                                                                    |
| ENSG00000109321    | <a href="#">AREG</a>     | amphiregulin; amphiregulin B                                                                                |
| ENSG00000124143    | <a href="#">ARHGAP40</a> | chromosome 20 open reading frame 95                                                                         |
| ENSG00000117407    | <a href="#">Artn</a>     | artemin                                                                                                     |
| ENSG00000151693    | <a href="#">Asap2</a>    | ArfGAP with SH3 domain, ankyrin repeat and PH domain 2                                                      |
| ENSG00000128272    | <a href="#">ATF4</a>     | activating transcription factor 4 (tax-responsive enhancer element B67); activating transcription factor 4C |
| ENSG00000174718    | <a href="#">C12orf35</a> | chromosome 12 open reading frame 35                                                                         |
| ENSG00000166780    | <a href="#">c16orf45</a> | chromosome 16 open reading frame 45                                                                         |
| ENSG00000174749    | <a href="#">c4orf32</a>  | chromosome 4 open reading frame 32                                                                          |
| ENSG00000151881    | <a href="#">C5orf28</a>  | chromosome 5 open reading frame 28                                                                          |
| ENSG00000137038    | <a href="#">C9orf123</a> | chromosome 9 open reading frame 123                                                                         |
| ENSG00000110888    | <a href="#">CAPRIN2</a>  | caprin family member 2                                                                                      |
| ENSG00000105971    | <a href="#">CAV2</a>     | caveolin 2                                                                                                  |
| ENSG00000114654    | <a href="#">CCDC48</a>   | coiled-coil domain containing 48                                                                            |
| ENSG00000163814    | <a href="#">CDCP1</a>    | CUB domain containing protein 1                                                                             |
| ENSG00000168944    | <a href="#">CEP120</a>   | centrosomal protein 120kDa                                                                                  |
| ENSG00000128965    | <a href="#">CHAC1</a>    | ChaC, cation transport regulator homolog 1 (E. coli)                                                        |
| ENSG00000115295    | <a href="#">CLIP4</a>    | CAP-GLY domain containing linker protein family, member 4                                                   |
| ENSG00000103647    | <a href="#">CORO2B</a>   | coronin, actin binding protein, 2B                                                                          |
| ENSG00000116761    | <a href="#">CTH</a>      | cystathionase (cystathionine gamma-lyase)                                                                   |
| ENSG00000168209    | <a href="#">dit4</a>     | DNA-damage-inducible transcript 4                                                                           |
| ENSG00000142197    | <a href="#">Dopey2</a>   | dopey family member 2                                                                                       |
| ENSG00000139318    | <a href="#">dusp6</a>    | dual specificity phosphatase 6                                                                              |

|                 |                          |                                                                                                                            |
|-----------------|--------------------------|----------------------------------------------------------------------------------------------------------------------------|
| ENSG00000107404 | <a href="#">DVL1</a>     | dishevelled, dsh homolog 1 (Drosophila); dishevelled, dsh homolog 1 (Drosophila)-like 1                                    |
| ENSG00000146648 | <a href="#">egfr</a>     | epidermal growth factor receptor (erythroblastic leukemia viral (v-erb-b) oncogene homolog, avian)                         |
| ENSG00000120738 | <a href="#">Egr1</a>     | early growth response 1                                                                                                    |
| ENSG00000156976 | <a href="#">EIF4A2</a>   | similar to eukaryotic translation initiation factor 4A2; eukaryotic translation initiation factor 4A, isoform 2            |
| ENSG00000187840 | <a href="#">EIF4EBP1</a> | eukaryotic translation initiation factor 4E binding protein 1                                                              |
| ENSG00000134531 | <a href="#">emp1</a>     | epithelial membrane protein 1                                                                                              |
| ENSG00000136628 | <a href="#">eprs</a>     | glutamyl-prolyl-tRNA synthetase                                                                                            |
| ENSG00000124882 | <a href="#">ereg</a>     | epiregulin                                                                                                                 |
| ENSG00000116285 | <a href="#">ERRFI1</a>   | ERBB receptor feedback inhibitor 1                                                                                         |
| ENSG00000179715 | <a href="#">FAM113B</a>  | family with sequence similarity 113, member B                                                                              |
| ENSG00000101311 | <a href="#">FERMT1</a>   | fermitin family homolog 1 (Drosophila)                                                                                     |
| ENSG00000162344 | <a href="#">FGF19</a>    | fibroblast growth factor 19                                                                                                |
| ENSG00000166206 | <a href="#">GABRB3</a>   | gamma-aminobutyric acid (GABA) A receptor, beta 3                                                                          |
| ENSG00000106105 | <a href="#">Gars</a>     | glycyl-tRNA synthetase                                                                                                     |
| ENSG00000159131 | <a href="#">GART</a>     | phosphoribosylglycinamide formyltransferase, phosphoribosylglycinamide synthetase, phosphoribosylaminoimidazole synthetase |
| ENSG00000001084 | <a href="#">GCLC</a>     | glutamate-cysteine ligase, catalytic subunit                                                                               |
| ENSG00000198380 | <a href="#">GFPT1</a>    | glutamine-fructose-6-phosphate transaminase 1                                                                              |
| ENSG00000112699 | <a href="#">Gmids</a>    | GDP-mannose 4,6-dehydratase                                                                                                |
| ENSG00000159592 | <a href="#">GPBP1L1</a>  | GC-rich promoter binding protein 1-like 1                                                                                  |
| ENSG00000125772 | <a href="#">GPCPD1</a>   | hypothetical protein KIAA1434                                                                                              |
| ENSG00000023171 | <a href="#">Gramd1b</a>  | GRAM domain containing 1B                                                                                                  |
| ENSG00000106070 | <a href="#">GRB10</a>    | growth factor receptor-bound protein 10                                                                                    |
| ENSG00000068097 | <a href="#">HEATR6</a>   | HEAT repeat containing 6                                                                                                   |
| ENSG00000122557 | <a href="#">herpud2</a>  | HERPUD family member 2                                                                                                     |
| ENSG00000182952 | <a href="#">HMGN4</a>    | high mobility group nucleosomal binding domain 4                                                                           |
| ENSG00000115756 | <a href="#">hpcal1</a>   | hippocalcin-like 1                                                                                                         |
| ENSG00000002587 | <a href="#">Hs3st1</a>   | heparan sulfate (glucosamine) 3-O-sulfotransferase 1                                                                       |
| ENSG00000003147 | <a href="#">Ica1</a>     | islet cell autoantigen 1, 69kDa                                                                                            |
| ENSG00000160888 | <a href="#">ier2</a>     | immediate early response 2                                                                                                 |
| ENSG00000006652 | <a href="#">ifrd1</a>    | interferon-related developmental regulator 1                                                                               |
| ENSG00000164171 | <a href="#">ITGA2</a>    | integrin, alpha 2 (CD49B, alpha 2 subunit of VLA-2 receptor)                                                               |
| ENSG00000008083 | <a href="#">jarid2</a>   | jumonji, AT rich interactive domain 2                                                                                      |
| ENSG00000140044 | <a href="#">JDP2</a>     | Jun dimerization protein 2                                                                                                 |
| ENSG00000006459 | <a href="#">Jhdm1d</a>   | jumonji C domain containing histone demethylase 1 homolog D (S. cerevisiae)                                                |
| ENSG00000026559 | <a href="#">KCNG1</a>    | potassium voltage-gated channel, subfamily G, member 1                                                                     |
| ENSG00000104783 | <a href="#">KCNN4</a>    | potassium intermediate/small conductance calcium-activated channel, subfamily N, member 4                                  |
| ENSG00000114656 | <a href="#">KIAA1257</a> | KIAA1257                                                                                                                   |
| ENSG00000169926 | <a href="#">KLF13</a>    | Kruppel-like factor 13                                                                                                     |
| ENSG00000136826 | <a href="#">Klf4</a>     | Kruppel-like factor 4 (gut)                                                                                                |
| ENSG00000102554 | <a href="#">Klf5</a>     | Kruppel-like factor 5 (intestinal)                                                                                         |
| ENSG00000171401 | <a href="#">KRT13</a>    | keratin 13                                                                                                                 |
| ENSG00000186007 | <a href="#">LEMD1</a>    | LEM domain containing 1                                                                                                    |
| ENSG00000124831 | <a href="#">Lrrfip1</a>  | leucine rich repeat (in FLII) interacting protein 1                                                                        |
| ENSG00000119681 | <a href="#">LTBP2</a>    | latent transforming growth factor beta binding protein 2                                                                   |
| ENSG00000166986 | <a href="#">mars</a>     | methionyl-tRNA synthetase                                                                                                  |
| ENSG00000112139 | <a href="#">MDGA1</a>    | MAM domain containing glycosylphosphatidylinositol anchor 1                                                                |
| ENSG00000120254 | <a href="#">MTHFD1L</a>  | methylenetetrahydrofolate dehydrogenase (NADP+ dependent) 1-like                                                           |
| ENSG00000065911 | <a href="#">mthfd2</a>   | methylenetetrahydrofolate dehydrogenase (NADP+ dependent) 2, methenyltetrahydrofolate cyclohydrolase                       |
| ENSG00000188554 | <a href="#">NBR1</a>     | neighbor of BRCA1 gene 1                                                                                                   |
| ENSG00000135318 | <a href="#">NT5E</a>     | 5'-nucleotidase, ecto (CD73)                                                                                               |
| ENSG00000101188 | <a href="#">Ntsr1</a>    | neurotensin receptor 1 (high affinity)                                                                                     |
| ENSG00000184232 | <a href="#">OAF</a>      | OAF homolog (Drosophila)                                                                                                   |

|                 |                          |                                                                                                                  |
|-----------------|--------------------------|------------------------------------------------------------------------------------------------------------------|
| ENSG00000205922 | <a href="#">Onecut3</a>  | one cut homeobox 3                                                                                               |
| ENSG00000137819 | <a href="#">Paqr5</a>    | progesterone and adiponectin receptor family member V                                                            |
| ENSG00000168300 | <a href="#">PCMTD1</a>   | protein-L-isoaspartate (D-aspartate) O-methyltransferase domain containing 1                                     |
| ENSG00000150593 | <a href="#">PDCD4</a>    | programmed cell death 4 (neoplastic transformation inhibitor)                                                    |
| ENSG00000060642 | <a href="#">PIGV</a>     | phosphatidylinositol glycan anchor biosynthesis, class V                                                         |
| ENSG00000137193 | <a href="#">Pim1</a>     | pim-1 oncogene                                                                                                   |
| ENSG00000154217 | <a href="#">PITPNC1</a>  | phosphatidylinositol transfer protein, cytoplasmic 1                                                             |
| ENSG00000010438 | <a href="#">prss3</a>    | protease, serine, 3                                                                                              |
| ENSG00000135069 | <a href="#">PSAT1</a>    | chromosome 8 open reading frame 62; phosphoserine aminotransferase 1                                             |
| ENSG00000070159 | <a href="#">Ptpn3</a>    | protein tyrosine phosphatase, non-receptor type 3                                                                |
| ENSG00000179912 | <a href="#">R3HDM2</a>   | R3H domain containing 2                                                                                          |
| ENSG00000185989 | <a href="#">Rasa3</a>    | RAS p21 protein activator 3                                                                                      |
| ENSG00000144468 | <a href="#">RHBDD1</a>   | rhomboid domain containing 1                                                                                     |
| ENSG00000139725 | <a href="#">Rhof</a>     | ras homolog gene family, member F (in filopodia)                                                                 |
| ENSG00000013561 | <a href="#">RNF14</a>    | ring finger protein 14                                                                                           |
| ENSG00000130363 | <a href="#">RSPH3</a>    | radial spoke 3 homolog (Chlamydomonas)                                                                           |
| ENSG00000159216 | <a href="#">Runx1</a>    | runt-related transcription factor 1                                                                              |
| ENSG00000031698 | <a href="#">SARS</a>     | seryl-tRNA synthetase                                                                                            |
| ENSG00000064932 | <a href="#">SBNO2</a>    | strawberry notch homolog 2 (Drosophila)                                                                          |
| ENSG00000185033 | <a href="#">SEMA4B</a>   | sema domain, immunoglobulin domain (Ig), transmembrane domain (TM) and short cytoplasmic domain, (semaphorin) 4B |
| ENSG00000147010 | <a href="#">Sh3kbp1</a>  | SH3-domain kinase binding protein 1                                                                              |
| ENSG00000125089 | <a href="#">SH3TC1</a>   | SH3 domain and tetratricopeptide repeats 1                                                                       |
| ENSG00000144136 | <a href="#">SLC20A1</a>  | solute carrier family 20 (phosphate transporter), member 1                                                       |
| ENSG00000134294 | <a href="#">slc38a2</a>  | solute carrier family 38, member 2                                                                               |
| ENSG00000149150 | <a href="#">SLC43A1</a>  | solute carrier family 43, member 1                                                                               |
| ENSG00000196517 | <a href="#">SLC6A9</a>   | solute carrier family 6 (neurotransmitter transporter, glycine), member 9                                        |
| ENSG00000139514 | <a href="#">SLC7A1</a>   | solute carrier family 7 (cationic amino acid transporter, y+ system), member 1                                   |
| ENSG00000151012 | <a href="#">SLC7A11</a>  | solute carrier family 7, (cationic amino acid transporter, y+ system) member 11                                  |
| ENSG00000166949 | <a href="#">SMAD3</a>    | SMAD family member 3                                                                                             |
| ENSG00000108854 | <a href="#">SMURF2</a>   | SMAD specific E3 ubiquitin protein ligase 2                                                                      |
| ENSG00000072310 | <a href="#">Srebf1</a>   | sterol regulatory element binding transcription factor 1                                                         |
| ENSG00000113739 | <a href="#">STC2</a>     | stanniocalcin 2                                                                                                  |
| ENSG00000196182 | <a href="#">Stk40</a>    | serine/threonine kinase 40                                                                                       |
| ENSG00000135269 | <a href="#">tes</a>      | testis derived transcript (3 LIM domains)                                                                        |
| ENSG00000150403 | <a href="#">TMCO3</a>    | transmembrane and coiled-coil domains 3                                                                          |
| ENSG00000067182 | <a href="#">TNFRSF1A</a> | tumor necrosis factor receptor superfamily, member 1A                                                            |
| ENSG00000101255 | <a href="#">TRIB3</a>    | tribbles homolog 3 (Drosophila)                                                                                  |
| ENSG00000102804 | <a href="#">Tsc22d1</a>  | TSC22 domain family, member 1                                                                                    |
| ENSG00000111981 | <a href="#">ULBP1</a>    | UL16 binding protein 1                                                                                           |
| ENSG00000128564 | <a href="#">VGF</a>      | VGF nerve growth factor inducible                                                                                |
| ENSG00000100219 | <a href="#">Xbp1</a>     | X-box binding protein 1                                                                                          |
| ENSG00000184575 | <a href="#">Xpot</a>     | exportin, tRNA (nuclear export receptor for tRNAs); similar to Exportin-T (tRNA exportin) (Exportin(tRNA))       |
| ENSG00000134684 | <a href="#">Yars</a>     | tyrosyl-tRNA synthetase                                                                                          |
| ENSG00000188177 | <a href="#">ZC3H6</a>    | zinc finger CCCH-type containing 6                                                                               |
| ENSG00000104231 | <a href="#">Zfand1</a>   | zinc finger, AN1-type domain 1                                                                                   |
| ENSG00000128016 | <a href="#">ZFP36</a>    | zinc finger protein 36, C3H type, homolog (mouse)                                                                |
| ENSG00000185650 | <a href="#">zfp3611</a>  | zinc finger protein 36, C3H type-like 1                                                                          |
| ENSG00000160961 | <a href="#">ZNF333</a>   | zinc finger protein 333                                                                                          |
| ENSG00000198205 | <a href="#">ZXDA</a>     | zinc finger, X-linked, duplicated A                                                                              |

**Table S2** A list of genes whose expression was up-regulated in HCT116 cells in all three cases (myxothiazol 5h, 13h, myxothiazol +uridine 13h), but reliably decreased after myxothiazol alone treatment for 13 h in comparison to the expression of the same genes after treatment by myxothiazol and uridine for 13 h. mRNA-Seq results.

| Ensemble ID     | Gene symbol             | David Gene Name                                                                |
|-----------------|-------------------------|--------------------------------------------------------------------------------|
| ENSG00000179833 | <a href="#">SERTAD2</a> | SERTA domain containing 2                                                      |
| ENSG00000184489 | <a href="#">ptp4a3</a>  | protein tyrosine phosphatase type IVA, member 3                                |
| ENSG00000187720 | <a href="#">THSD4</a>   | thrombospondin, type I, domain containing 4                                    |
| ENSG00000101280 | <a href="#">Anqpt4</a>  | angiopoietin 4                                                                 |
| ENSG00000205420 | <a href="#">KRT6A</a>   | keratin 6A                                                                     |
| ENSG00000163216 | <a href="#">SPRR2D</a>  | small proline-rich protein 2D                                                  |
| ENSG00000136068 | <a href="#">FLNB</a>    | filamin B, beta (actin binding protein 278)                                    |
| ENSG00000175197 | <a href="#">DDIT3</a>   | DNA-damage-inducible transcript 3                                              |
| ENSG00000125826 | <a href="#">RBCK1</a>   | RanBP-type and C3HC4-type zinc finger containing 1                             |
| ENSG00000120875 | <a href="#">DUSP4</a>   | dual specificity phosphatase 4                                                 |
| ENSG00000185567 | <a href="#">AHNAK2</a>  | AHNAK nucleoprotein 2                                                          |
| ENSG00000196352 | <a href="#">Cd55</a>    | CD55 molecule, decay accelerating factor for complement (Cromer blood group)   |
| ENSG00000138678 | <a href="#">AGPAT9</a>  | 1-acylglycerol-3-phosphate O-acyltransferase 9                                 |
| ENSG00000005884 | <a href="#">ITGA3</a>   | integrin, alpha 3 (antigen CD49C, alpha 3 subunit of VLA-3 receptor)           |
| ENSG00000198431 | <a href="#">TXNRD1</a>  | thioredoxin reductase 1; hypothetical LOC100130902                             |
| ENSG00000049239 | <a href="#">H6pd</a>    | hexose-6-phosphate dehydrogenase (glucose 1-dehydrogenase)                     |
| ENSG00000166750 | <a href="#">Slfn5</a>   | schlafen family member 5                                                       |
| ENSG00000166123 | <a href="#">GPT2</a>    | glutamic pyruvate transaminase (alanine aminotransferase) 2                    |
| ENSG00000183696 | <a href="#">upp1</a>    | uridine phosphorylase 1                                                        |
| ENSG00000175592 | <a href="#">FOSL1</a>   | FOS-like antigen 1                                                             |
| ENSG00000135842 | <a href="#">FAM129A</a> | family with sequence similarity 129, member A                                  |
| ENSG00000105281 | <a href="#">SLC1A5</a>  | solute carrier family 1 (neutral amino acid transporter), member 5             |
| ENSG00000167767 | <a href="#">KRT80</a>   | keratin 80                                                                     |
| ENSG00000132470 | <a href="#">ITGB4</a>   | integrin, beta 4                                                               |
| ENSG00000137936 | <a href="#">bcar3</a>   | breast cancer anti-estrogen resistance 3                                       |
| ENSG00000103257 | <a href="#">SLC7A5</a>  | solute carrier family 7 (cationic amino acid transporter, y+ system), member 5 |
| ENSG00000116584 | <a href="#">Arhaef2</a> | Rho/Rac guanine nucleotide exchange factor (GEF) 2                             |
| ENSG00000165175 | <a href="#">mid1ip1</a> | MID1 interacting protein 1 (gastrulation specific G12 homolog (zebrafish))     |
| ENSG00000186832 | <a href="#">Krt16</a>   | keratin 16; keratin type 16-like                                               |
| ENSG00000135480 | <a href="#">Krt7</a>    | keratin 7                                                                      |
| ENSG00000187678 | <a href="#">SPRY4</a>   | sprouty homolog 4 (Drosophila)                                                 |
| ENSG00000169504 | <a href="#">CLIC4</a>   | chloride intracellular channel 4                                               |
| ENSG00000156510 | <a href="#">HKDC1</a>   | hexokinase domain containing 1                                                 |
| ENSG00000172432 | <a href="#">atpbbp2</a> | GTP binding protein 2                                                          |

**Table S3.** Differential expression of apoptotic genes in HCT116 cells on the basis of mRNA-Seq data after mitochondrial ETC complex III inhibition with myxothiazol for 5h (M5), 13 h (M13), 17 h (M17) and for 13 h in the presence of uridine (MU13). N16 – treatment with Nutlin-3 for 16 h. Fold changes in mRNA levels are presented (FDR < 0.05). NC – no change.

| Ensemble ID     | Gene symbol               | David Gene Name                                            | mRNA fold changes |       |       |      |       |
|-----------------|---------------------------|------------------------------------------------------------|-------------------|-------|-------|------|-------|
|                 |                           |                                                            | M5                | M13   | M17   | MU13 | N16   |
| ENSG00000143382 | <a href="#">ADAMTSL4</a>  | ADAMTS-like 4                                              | NC                | 3.0   | 3.2   | NC   | NC    |
| ENSG00000183773 | <a href="#">aifm3</a>     | apoptosis-inducing factor, mitochondrion-associated, 3     | NC                | 4.01  | 3.2   | NC   | NC    |
| ENSG00000105290 | <a href="#">Aplp1</a>     | amyloid beta (A4) precursor-like protein 1                 | NC                | 2.57  | 3.09  | NC   | NC    |
| ENSG00000105327 | <a href="#">BBC3</a>      | BCL2 binding component 3                                   | 1.45              | 1.89  | 2.96  | NC   | 6.40  |
| ENSG00000153094 | <a href="#">BCL2L11</a>   | BCL2-like 11 (apoptosis facilitator)                       | NC                | 2.01  | 2.06  | NC   | NC    |
| ENSG00000100290 | <a href="#">BIK</a>       | BCL2-interacting killer (apoptosis-inducing)               | 1.88              | 1.38  | 2.04  | NC   | 2.1   |
| ENSG00000166619 | <a href="#">BLCAP</a>     | bladder cancer associated protein                          | NC                | 2.47  | 2.47  | NC   | 2.18  |
| ENSG00000164305 | <a href="#">Casp3</a>     | caspase 3, apoptosis-related cysteine peptidase            | NC                | 2.44  | 2.57  | NC   | NC    |
| ENSG00000165806 | <a href="#">casp7</a>     | caspase 7, apoptosis-related cysteine peptidase            | NC                | 1.68  | 2.76  | 0.67 | NC    |
| ENSG00000144655 | <a href="#">CSRNP1</a>    | cysteine-serine-rich nuclear protein 1                     | 1.59              | 3.01  | 4.13  | NC   | 2.01  |
| ENSG00000110925 | <a href="#">CSRNP2</a>    | cysteine-serine-rich nuclear protein 2                     | 1.66              | 4.29  | 3.74  | NC   | NC    |
| ENSG00000136048 | <a href="#">DRAM1</a>     | DNA-damage regulated autophagy modulator 1                 | NC                | 1.51  | 2.08  | NC   | 2.98  |
| ENSG00000026103 | <a href="#">Fas</a>       | Fas (TNF receptor superfamily, member 6)                   | NC                | 2.50  | 3.40  | NC   | 4.25  |
| ENSG00000116717 | <a href="#">GADD45A</a>   | growth arrest and DNA-damage-inducible, alpha              | 1.82              | 2.77  | 2.55  | 1.52 | 3.72  |
| ENSG00000111653 | <a href="#">Ing4</a>      | inhibitor of growth family, member 4                       | NC                | 2.37  | 2.41  | NC   | NC    |
| ENSG00000177606 | <a href="#">Jun</a>       | jun oncogene                                               | 1.68              | 3.26  | 4.91  | NC   | NC    |
| ENSG00000177595 | <a href="#">Lrdd</a>      | leucine-rich repeats and death domain containing           | NC                | 2.47  | 2.97  | NC   | 2.31  |
| ENSG00000165943 | <a href="#">Moap1</a>     | modulator of apoptosis 1                                   | NC                | 3.10  | 3.08  | NC   | NC    |
| ENSG00000064300 | <a href="#">Ngfr</a>      | nerve growth factor receptor (TNFR superfamily, member 16) | 2.99              | 3.52  | 4.18  | NC   | NC    |
| ENSG00000091592 | <a href="#">Nlrp1</a>     | NLR family, pyrin domain containing 1                      | 2.60              | 2.15  | 2.36  | 1.73 | 7.54  |
| ENSG00000181649 | <a href="#">phlda2</a>    | pleckstrin homology-like domain, family A, member 2        | 2.07              | 2.68  | 3.65  | NC   | NC    |
| ENSG00000174307 | <a href="#">Phlda3</a>    | pleckstrin homology-like domain, family A, member 3        | NC                | 1.58  | 2.80  | 0.73 | 4.88  |
| ENSG00000141682 | <a href="#">PMAIP1</a>    | phorbol-12-myristate-13-acetate-induced protein 1          | 2.04              | 4.79  | 3.10  | 1.72 | NC    |
| ENSG00000164543 | <a href="#">STK17A</a>    | serine/threonine kinase 17a                                | 1.37              | 1.95  | 2.48  | NC   | NC    |
| ENSG00000120889 | <a href="#">tnfrsf10b</a> | tumor necrosis factor receptor superfamily, member 10b     | 1.60              | 2.77  | 2.42  | 1.30 | 2.74  |
| ENSG00000125657 | <a href="#">TNFSF9</a>    | tumor necrosis factor (ligand) superfamily, member 9       | NC                | 3.34  | 3.23  | NC   | NC    |
| ENSG00000164938 | <a href="#">TP53INP1</a>  | tumor protein p53 inducible nuclear protein 1              | NC                | 10.78 | 28.58 | NC   | 125.4 |
